# Supplementary material for: Nucleosome-directed replication origin licensing independent of a consensus DNA sequence
Source: PubMed Central journal article supplement (PMC9399094; doi:10.1038/s41467-022-32657-7), 2022-08-23
Supplement: 41467_2022_32657_MOESM3_ESM.pdf [file 41467_2022_32657_MOESM3_ESM.pdf]

## **Description of Additional Source Data Files**

Supplementary Data File 1. - Legend: "The correspondence between identified Orc1 peaks and previously annotated ARSs."

### Source Data Legends

Source Data Fig. 2. - Statistical source data for Fig. 2d and 2e.

Source Data Fig. 3. - Statistical source data for Fig. 3c, 3e, 3f and 3i.

Source Data Fig. 4.- Statistical source data for Fig. 4c and 4d.

Source Data Fig. 5.- Statistical source data for Fig. 5c, 5d and 5e.

Source Data Fig. 6.- Statistical source data for Fig. 6c.

Source Data Supp Fig. 2.- Full scan images for Supp. Fig. 2.

Source Data Supp Fig. 5. - Statistical source data for Supp. Fig. 5.

Source Data Supp Fig. 6. - Statistical source data for Supp. Fig. 6c.

Source Data Supp Fig. 7. - Statistical source data for Supp. Fig. 7d.
